# Supplementary material
Source: bioRxiv or medRxiv preprint supplement (https://medrxiv.org/highwire/filestream/79074/field_highwire_adjunct_files/0/2020.05.04.20082081-1.pdf)
Supplement: Supplementary file [file 2020.05.04.20082081-1.pdf]

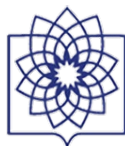

Shahid Beheshti University of  
Medical Sciences

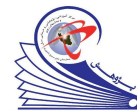

National Research Institute of  
Tuberculosis and Lung Diseases -  
Shahid Beheshti University of  
Medical Sciences

## Research Ethics Certificate

|                         |                                                                                                                                                                                                                                                                                                                                                                                                                                                                                                                                                                                                                            |                |            |
|-------------------------|----------------------------------------------------------------------------------------------------------------------------------------------------------------------------------------------------------------------------------------------------------------------------------------------------------------------------------------------------------------------------------------------------------------------------------------------------------------------------------------------------------------------------------------------------------------------------------------------------------------------------|----------------|------------|
| Approval ID:            | IR.SBMU.NRITLD.REC.1399.024                                                                                                                                                                                                                                                                                                                                                                                                                                                                                                                                                                                                | Approval Date: | 2020-03-10 |
| Evaluated by:           | National Research Institute of Tuberculosis and Lung Diseases -<br>Shahid Beheshti University of Medical Sciences                                                                                                                                                                                                                                                                                                                                                                                                                                                                                                          |                |            |
| Status:                 | Approved                                                                                                                                                                                                                                                                                                                                                                                                                                                                                                                                                                                                                   |                |            |
| Approval Statement:     | The project was found to be in accordance to the ethical principles and the national norms and standards for conducting Medical Research in Iran.<br><br>Notice:<br><ol style="list-style-type: none"><li>1. Although the proposal has been approved by the research ethics committee, meeting the professional and legal requirements is the sole responsibility of the PI and other project collaborators.</li><li>2. This certificate is reliant on the proposal/documents received by this committee on 2020-03-10. The committee must be notified by the PI as soon as the proposal/documents are modified.</li></ol> |                |            |
| Proposal Title:         | ai-corona (artificial intelligence): Radiologist-Assistant Deep Learning Framework for COVID-19 Diagnosis in Chest CT Scans                                                                                                                                                                                                                                                                                                                                                                                                                                                                                                |                |            |
| Principal Investigator: | Name: Atefeh Abedini<br>Email: dr.abedini110@sbmu.ac.ir                                                                                                                                                                                                                                                                                                                                                                                                                                                                                                                                                                    |                |            |

  
Dr. Ali Akbar Velayati

Director of Institutional Research Ethics Committee  
National Research Institute of Tuberculosis and Lung  
Diseases - Shahid Beheshti University of Medical Sciences

  
Dr. Parissa Farnia

Secretary of Institutional Research Ethics Committee  
National Research Institute of Tuberculosis and Lung  
Diseases - Shahid Beheshti University of Medical Sciences
